# Supplementary material
Source: PubMed Central journal article supplement (PMC4210840)
Supplement: NIHMS60676-supplement-Supplement_Material.pdf [file NIHMS60676-supplement-Supplement_Material.pdf]

## Supplement Material

This file includes

1. **Supplementary Table I. Single nucleotide polymorphisms (SNPs) associated with coronary heart disease**
2. **Supplementary Table II. Association results for single nucleotide polymorphisms (SNPs) and cardiovascular events**
3. **Supplementary Table III. Reclassification of individuals in four risk categories after addition of genetic risk score (GRS) to a model with traditional risk factors – sensitivity analysis**
4. **Supplementary Table IV. Assessment of over-fitting in discrimination and reclassification measures**
5. **Supplementary Figure I. Genetic risk score deciles and risk for cardiovascular disease (CVD) and acute coronary syndrome (ACS)**
6. **Supplementary Figure II. Risk allele count and risk for coronary heart disease (CHD), acute coronary syndrome (ACS) and cardiovascular disease (CVD)**
7. **References**

| Supplementary Table I. Single nucleotide polymorphisms (SNPs) associated with coronary heart disease |          |                               |             |                               |           |         |           |
|------------------------------------------------------------------------------------------------------|----------|-------------------------------|-------------|-------------------------------|-----------|---------|-----------|
| SNP                                                                                                  | Region   | Reported Gene(s)              | Risk allele | Risk allele freq. in controls |           | Weight† | Reference |
|                                                                                                      |          |                               |             | Study cohorts                 | Reference |         |           |
| rs646776                                                                                             | 1p13.3   | <i>CELSR2, PSRC1, SORT1</i>   | T           | 0.79                          | 0.81      | 1.19    | 1         |
| rs11206510                                                                                           | 1p32.3   | PCSK9                         | T           | 0.84                          | 0.82      | 1.08    | 2         |
| rs17465637                                                                                           | 1q41     | MIA3                          | C           | 0.75                          | 0.74      | 1.14    | 2         |
| rs6725887                                                                                            | 2q33.1   | WDR12                         | C           | 0.11                          | 0.15      | 1.14    | 2         |
| rs2306374                                                                                            | 3q22.3   | MRAS                          | C           | 0.10                          | 0.18      | 1.12    | 2         |
| rs12526453                                                                                           | 6p24.1   | PHACTR1                       | C           | 0.56                          | 0.65      | 1.12    | 1         |
| rs3798220                                                                                            | 6q25.3   | LPA                           | C           | 0.01                          | 0.02      | 1.54    | 2         |
| rs4977574                                                                                            | 9p21.3   | CDKN2A/B, ANRIL               | G           | 0.43                          | 0.46      | 1.29    | 2         |
| rs1746048                                                                                            | 10q11.21 | CXCL12                        | C           | 0.84                          | 0.87      | 1.09    | 2         |
| rs3184504                                                                                            | 12q24.12 | SH2B3                         | T           | 0.40                          | 0.44      | 1.07    | 2         |
| rs1122608                                                                                            | 19p13.2  | LDLR                          | G           | 0.79                          | 0.77      | 1.14    | 2         |
| rs9982601                                                                                            | 21q22.11 | MRPS6                         | T           | 0.13                          | 0.15      | 1.18    | 2         |
| rs2259816                                                                                            | 12q24.31 | HNFA1                         | T           | 0.37                          | 0.36      | 1.08    | 3         |
| rs17114036                                                                                           | 1p32.2   | PPAP2B                        | A           | 0.89                          | 0.91      | 1.17    | 2         |
| rs17609940                                                                                           | 6p21.31  | ANKS1A                        | G           | 0.81                          | 0.75      | 1.07    | 2         |
| rs11556924                                                                                           | 7q32.2   | ZC3HC1                        | C           | 0.67                          | 0.62      | 1.09    | 2         |
| rs579459                                                                                             | 9q34.2   | ABO                           | C           | 0.22                          | 0.21      | 1.10    | 2         |
| rs12413409                                                                                           | 10q24.32 | <i>CYP17A1, CNNM2, NT5C2</i>  | G           | 0.92                          | 0.89      | 1.12    | 2         |
| rs964184                                                                                             | 11q23.3  | <i>ZNF259, APOA5-A4-C3-A1</i> | G           | 0.14                          | 0.13      | 1.13    | 2         |
| rs4773144                                                                                            | 13q34    | COL4A1, COL4A2                | G           | 0.40                          | 0.44      | 1.07    | 2         |
| rs2895811                                                                                            | 14q32.2  | HHIPL1                        | C           | 0.42                          | 0.43      | 1.07    | 2         |
| rs3825807                                                                                            | 15q25.1  | ADAMTS7                       | A           | 0.65                          | 0.57      | 1.08    | 2         |
| rs12936587                                                                                           | 17p11.2  | <i>RASD1, SMCR3, PEMT</i>     | G           | 0.65                          | 0.56      | 1.07    | 2         |
| rs216172                                                                                             | 17p13.3  | SMG6, SRR                     | C           | 0.35                          | 0.37      | 1.07    | 2         |

| SNP        | Region   | Reported Gene(s)            | Risk allele | Risk allele freq. in controls |           | Weight† | Reference |
|------------|----------|-----------------------------|-------------|-------------------------------|-----------|---------|-----------|
|            |          |                             |             | Study cohorts                 | Reference |         |           |
| rs46522    | 17q21.32 | UBE2Z, GIP,<br>ATP5G1, SNF8 | T           | 0.55                          | 0.53      | 1.06    | 2         |
| rs1412444  | 10q23.31 | LIPA                        | T           | 0.42                          | 0.42      | 1.09    | 4         |
| rs4380028  | 15q25.1  | ADAMTS7-MORF4L1             | C           | 0.70                          | 0.65      | 1.07    | 4         |
| rs10953541 | 7q22.3   | NR                          | C           | 0.74                          | 0.80      | 1.08    | 4         |

† Odds ratios from the reference studies were used as weights for the risk allele counts to generate the genetic risk score

| <b>Supplementary Table II. Association results for single nucleotide polymorphisms (SNPs) and cardiovascular events</b> |              |                              |             |                             |                            |                             |               |                             |                            |
|-------------------------------------------------------------------------------------------------------------------------|--------------|------------------------------|-------------|-----------------------------|----------------------------|-----------------------------|---------------|-----------------------------|----------------------------|
| SNP                                                                                                                     | Region       | Reported Gene(s)             | Risk allele | Coronary heart disease      |                            | Acute coronary syndrome     |               | Cardiovascular disease      |                            |
|                                                                                                                         |              |                              |             | HR (95% CI)                 | P value                    | HR (95% CI)                 | P value       | HR (95% CI)                 | P value                    |
| rs646776                                                                                                                | 1p13.3       | <i>CELSR2, PSRC1, SORT1</i>  | T           | 1.05 ( 0.94 , 1.17 )        | 0.37                       | 1.02 ( 0.90 , 1.15 )        | 0.79          | 1.02 ( 0.94 , 1.12 )        | 0.60                       |
| rs11206510                                                                                                              | 1p32.3       | PCSK9                        | T           | 1.04 ( 0.93 , 1.17 )        | 0.51                       | 1.07 ( 0.93 , 1.23 )        | 0.35          | 1.04 ( 0.95 , 1.15 )        | 0.40                       |
| rs17465637                                                                                                              | 1q41         | MIA3                         | C           | 1.04 ( 0.94 , 1.15 )        | 0.41                       | 1.05 ( 0.93 , 1.19 )        | 0.40          | 1.07 ( 0.98 , 1.16 )        | 0.12                       |
| rs6725887                                                                                                               | 2q33.1       | WDR12                        | C           | <b>1.26 ( 1.11 , 1.43 )</b> | <b>0.0003</b>              | <b>1.21 ( 1.04 , 1.42 )</b> | <b>0.02</b>   | <b>1.13 ( 1.01 , 1.26 )</b> | <b>0.03</b>                |
| rs2306374                                                                                                               | 3q22.3       | MRAS                         | C           | 1.00 ( 0.87 , 1.14 )        | 0.98                       | 1.00 ( 0.85 , 1.18 )        | 0.97          | 1.04 ( 0.93 , 1.16 )        | 0.53                       |
| rs12526453                                                                                                              | 6p24.1       | PHACTR1                      | C           | <b>1.13 ( 1.04 , 1.23 )</b> | <b>0.004</b>               | <b>1.19 ( 1.07 , 1.32 )</b> | <b>0.0009</b> | <b>1.09 ( 1.01 , 1.17 )</b> | <b>0.02</b>                |
| rs3798220                                                                                                               | 6q25.3       | LPA                          | C           | <b>1.43 ( 1.02 , 2.00 )</b> | <b>0.04</b>                | 1.20 ( 0.77 , 1.86 )        | 0.42          | 1.21 ( 0.90 , 1.63 )        | 0.21                       |
| rs4977574                                                                                                               | 9p21.3       | <i>CDKN2A/B, ANRIL</i>       | G           | <b>1.19 ( 1.09 , 1.29 )</b> | <b>5.4×10<sup>-5</sup></b> | <b>1.16 ( 1.04 , 1.28 )</b> | <b>0.005</b>  | <b>1.19 ( 1.11 , 1.27 )</b> | <b>1.3×10<sup>-6</sup></b> |
| rs1746048                                                                                                               | 10q11.2<br>1 | CXCL12                       | C           | <b>1.31 ( 1.16 , 1.49 )</b> | <b>2.2×10<sup>-5</sup></b> | <b>1.33 ( 1.14 , 1.54 )</b> | <b>0.0003</b> | <b>1.20 ( 1.09 , 1.32 )</b> | <b>0.0004</b>              |
| rs3184504                                                                                                               | 12q24.1<br>2 | SH2B3                        | T           | 1.02 ( 0.94 , 1.12 )        | 0.60                       | 1.04 ( 0.94 , 1.15 )        | 0.45          | 1.07 ( 1.00 , 1.15 )        | 0.06                       |
| rs1122608                                                                                                               | 19p13.2      | LDLR                         | G           | 1.10 ( 0.98 , 1.22 )        | 0.10                       | 1.12 ( 0.98 , 1.27 )        | 0.12          | 1.02 ( 0.93 , 1.12 )        | 0.65                       |
| rs9982601                                                                                                               | 21q22.1<br>1 | MRPS6                        | T           | <b>1.18 ( 1.05 , 1.33 )</b> | <b>0.005</b>               | <b>1.17 ( 1.02 , 1.35 )</b> | <b>0.03</b>   | 1.09 ( 0.98 , 1.20 )        | 0.11                       |
| rs2259816                                                                                                               | 12q24.3<br>1 | HNF1A                        | T           | 1.01 ( 0.93 , 1.10 )        | 0.83                       | 1.04 ( 0.94 , 1.16 )        | 0.43          | 1.00 ( 0.93 , 1.07 )        | 0.98                       |
| rs17114036                                                                                                              | 1p32.2       | PPAP2B                       | A           | 1.06 ( 0.92 , 1.21 )        | 0.43                       | 1.02 ( 0.87 , 1.20 )        | 0.84          | 1.02 ( 0.92 , 1.14 )        | 0.69                       |
| rs17609940                                                                                                              | 6p21.31      | ANKS1A                       | G           | 1.02 ( 0.92 , 1.14 )        | 0.72                       | 1.05 ( 0.92 , 1.20 )        | 0.45          | 1.01 ( 0.92 , 1.10 )        | 0.88                       |
| rs11556924                                                                                                              | 7q32.2       | ZC3HC1                       | C           | 1.01 ( 0.92 , 1.11 )        | 0.80                       | 1.00 ( 0.90 , 1.12 )        | 0.98          | 0.99 ( 0.92 , 1.07 )        | 0.81                       |
| rs579459                                                                                                                | 9q34.2       | ABO                          | C           | 1.10 ( 0.99 , 1.21 )        | 0.07                       | <b>1.13 ( 1.00 , 1.27 )</b> | <b>0.05</b>   | 1.03 ( 0.95 , 1.12 )        | 0.51                       |
| rs12413409                                                                                                              | 10q24.3<br>2 | <i>CYP17A1, CNNM2, NT5C2</i> | G           | 1.04 ( 0.89 , 1.21 )        | 0.60                       | 1.08 ( 0.90 , 1.30 )        | 0.43          | 1.02 ( 0.90 , 1.16 )        | 0.72                       |

| SNP        | Region       | Reported Gene(s)         | Risk allele | Coronary heart disease      |              | Acute coronary syndrome     |             | Cardiovascular disease      |              |
|------------|--------------|--------------------------|-------------|-----------------------------|--------------|-----------------------------|-------------|-----------------------------|--------------|
|            |              |                          |             | HR (95% CI)                 | P value      | HR (95% CI)                 | P value     | HR (95% CI)                 | P value      |
| rs964184   | 11q23.3      | ZNF259, APOA5-A4-C3-A1   | G           | 1.02 ( 0.90 , 1.15 )        | 0.78         | 1.01 ( 0.88 , 1.17 )        | 0.85        | 1.05 ( 0.95 , 1.15 )        | 0.35         |
| rs4773144  | 13q34        | COL4A1, COL4A2           | G           | <b>1.10 ( 1.01 , 1.20 )</b> | <b>0.03</b>  | 1.07 ( 0.96 , 1.18 )        | 0.21        | 1.05 ( 0.98 , 1.12 )        | 0.20         |
| rs2895811  | 14q32.2      | HHIPL1                   | C           | <b>1.12 ( 1.03 , 1.22 )</b> | <b>0.009</b> | 1.10 ( 0.99 , 1.22 )        | 0.06        | 1.07 ( 1.00 , 1.15 )        | 0.06         |
| rs3825807  | 15q25.1      | ADAMTS7                  | A           | <b>1.13 ( 1.03 , 1.23 )</b> | <b>0.008</b> | <b>1.12 ( 1.01 , 1.25 )</b> | <b>0.04</b> | <b>1.10 ( 1.03 , 1.19 )</b> | <b>0.008</b> |
| rs12936587 | 17p11.2      | RASD1, SMCR3, PEMT       | G           | <b>1.11 ( 1.02 , 1.22 )</b> | <b>0.02</b>  | 1.05 ( 0.94 , 1.16 )        | 0.41        | 1.07 ( 1.00 , 1.16 )        | <b>0.05</b>  |
| rs216172   | 17p13.3      | SMG6, SRR                | C           | 1.06 ( 0.97 , 1.16 )        | 0.19         | 1.04 ( 0.93 , 1.15 )        | 0.50        | <b>1.08 ( 1.00 , 1.16 )</b> | <b>0.04</b>  |
| rs46522    | 17q21.3<br>2 | UBE2Z, GIP, ATP5G1, SNF8 | T           | 0.97 ( 0.89 , 1.06 )        | 0.49         | 0.98 ( 0.88 , 1.08 )        | 0.67        | 0.97 ( 0.90 , 1.04 )        | 0.37         |
| rs1412444  | 10q23.3<br>1 | LIPA                     | T           | 0.98 ( 0.9 , 1.07 )         | 0.63         | 1.00 ( 0.90 , 1.11 )        | 0.98        | 0.94 ( 0.87 , 1.01 )        | 0.09         |
| rs4380028  | 15q25.1      | ADAMTS7-MORF4L1          | C           | <b>1.12 ( 1.02 , 1.23 )</b> | <b>0.02</b>  | <b>1.15 ( 1.02 , 1.28 )</b> | <b>0.02</b> | 1.07 ( 1.00 , 1.16 )        | 0.06         |
| rs10953541 | 7q22.3       | NR                       | C           | 1.03 ( 0.94 , 1.14 )        | 0.50         | 1.04 ( 0.92 , 1.17 )        | 0.54        | 1.02 ( 0.94 , 1.10 )        | 0.63         |

Cox proportional hazards model adjusted for sex, total cholesterol, high-density lipoprotein (HDL) cholesterol, body-mass index, systolic blood pressure, blood pressure treatment, smoking and type 2 diabetes; age was used as the timescale.  
Abbreviations: HR, Hazard ratio; CI, confidence interval

**Supplementary Table III. Reclassification of individuals in four risk categories after addition of genetic risk score (GRS) to a model with traditional risk factors\* – sensitivity analysis\*\***

| Model without GRS |           | Model with GRS |       |        |      | NRI                           | Clinical NRI                                  |
|-------------------|-----------|----------------|-------|--------|------|-------------------------------|-----------------------------------------------|
|                   |           | 0-7%           | 7-12% | 12-22% | >22% |                               |                                               |
| 0-7%              | Events    | 121            | 22    | 0      | 0    | Events:<br>0.04 (P=0.03)      | Events:<br>0.10 (P=0.03)                      |
|                   | Nonevents | 8564           | 197   | 0      | 0    |                               |                                               |
|                   | All       | 8685           | 219   | 0      | 0    | Nonevents:<br>0.01 (P=0.0001) | Nonevents:<br>0.14 (P=3.7×10 <sup>-12</sup> ) |
| 7-12%             | Events    | 15             | 77    | 23     | 0    | All:<br>0.05 (P=0.008)        | All:<br>0.24 (P=9.1×10 <sup>-7</sup> )        |
|                   | Nonevents | 251            | 689   | 140    | 0    |                               |                                               |
|                   | All       | 266            | 766   | 163    | 0    |                               |                                               |
| 12-22%            | Events    | 0              | 25    | 122    | 43   |                               |                                               |
|                   | Nonevents | 2              | 182   | 546    | 73   |                               |                                               |
|                   | All       | 2              | 207   | 668    | 116  |                               |                                               |
| >22%              | Events    | 0              | 0     | 21     | 159  |                               |                                               |
|                   | Nonevents | 0              | 1     | 92     | 305  |                               |                                               |
|                   | All       | 0              | 1     | 113    | 464  |                               |                                               |

\*Traditional risk factors include sex, total cholesterol, high-density lipoprotein (HDL) cholesterol, body-mass index, systolic blood pressure, blood pressure treatment, smoking and type 2 diabetes; age was used as the timescale in the Cox proportional hazards model.  
\*\* Sensitivity of the choice of categories was tested by rising category thresholds by 2%

Abbreviations: NRI, net reclassification improvement

**Supplementary Table IV. Assessment of over-fitting in discrimination and reclassification measures**

|                                                              | Effects estimated directly from the test dataset* | Effects estimated from the training dataset** applied for calculating the linear predictors in the test dataset |
|--------------------------------------------------------------|---------------------------------------------------|-----------------------------------------------------------------------------------------------------------------|
| <b>C-index of the model with traditional risk factors</b>    | 0.859                                             | 0.855                                                                                                           |
| <b>C-index change with the addition of the GRS (P-value)</b> | 0.004 (P=0.007)                                   | 0.004 (P=0.012)                                                                                                 |
| <b>IDI (P-value)</b>                                         | 0.007 (P=4.2×10 <sup>-5</sup> )                   | 0.009 (P=1.3×10 <sup>-5</sup> )                                                                                 |
| <b>NRI (P-value)</b>                                         | 0.05 (P=0.01)                                     | 0.04 (P=0.05)                                                                                                   |

\* Test dataset: combined FINRISK 1992 and 1997 dataset  
\*\* Training dataset: FINRISK 2002 dataset. To justify the comparison with FINRISK 1992 and 1997 datasets, individuals with baseline lipid medication (N=454) were removed from the analysis.  
Abbreviations: FR, FINRISK; GRS, genetic risk score; IDI, integrated discrimination index; NRI, net reclassification improvement

**Supplementary Figure I. Genetic risk score deciles and risk for cardiovascular disease (CVD) and acute coronary syndrome (ACS).**

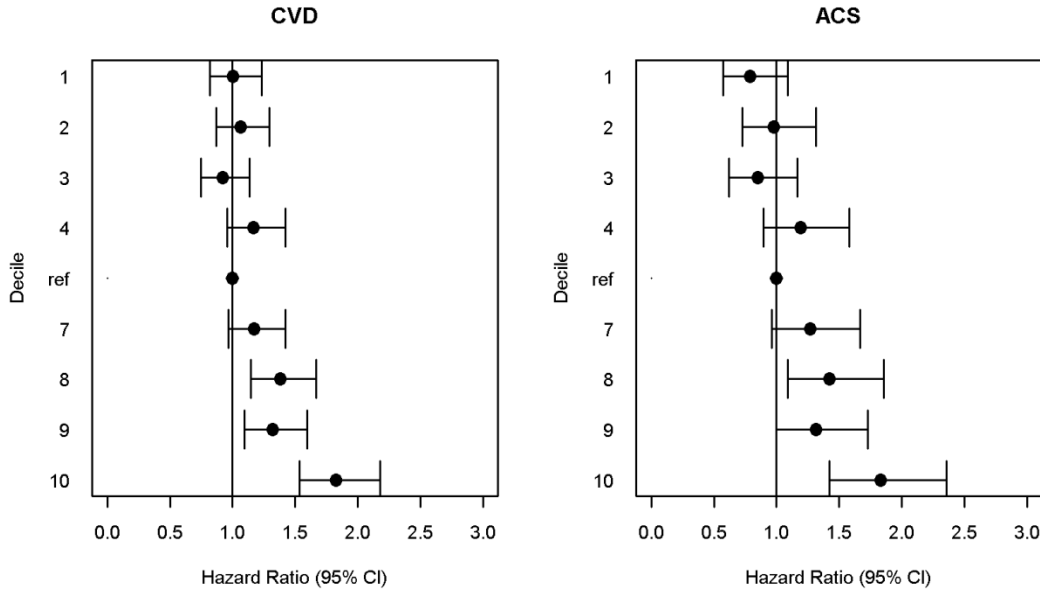

**Supplementary Figure II. Risk allele count and risk for coronary heart disease (CHD), acute coronary syndrome (ACS) and cardiovascular disease (CVD).**

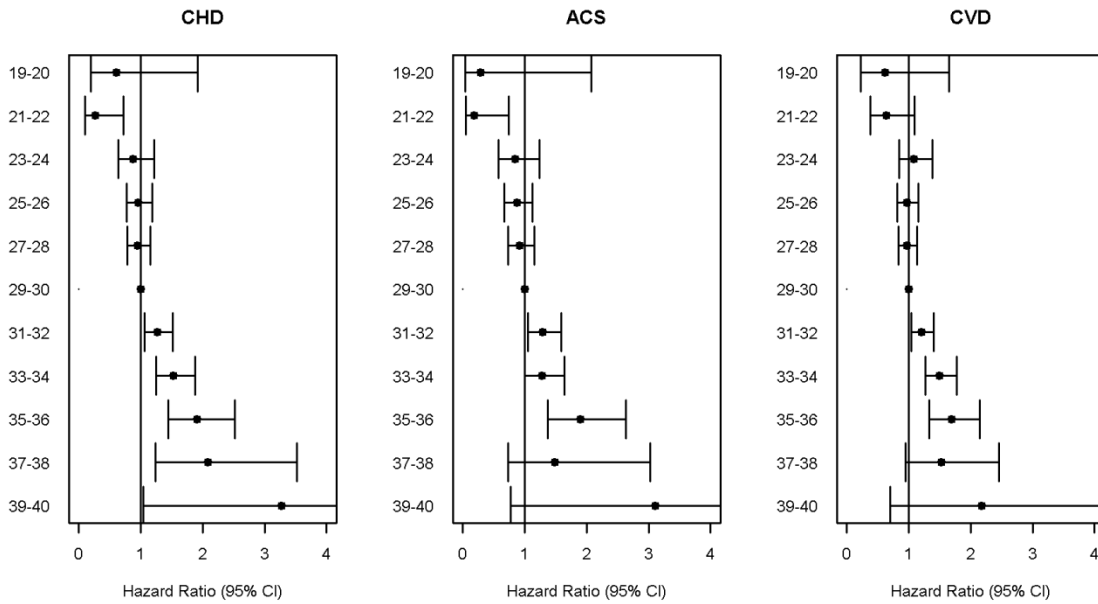

## References

1. Kathiresan S, Voight BF, Purcell S, et al. Genome-wide association of early-onset myocardial infarction with single nucleotide polymorphisms and copy number variants. *Nat Genet.* 2009;41:334-341.
2. Schunkert H, König IR, Kathiresan S, et al. Large-scale association analysis identifies 13 new susceptibility loci for coronary artery disease. *Nat Genet.* 2011;43:333-338.
3. Erdmann J, Grosshennig A, Braund PS, et al. New susceptibility locus for coronary artery disease on chromosome 3q22.3. *Nat Genet.* 2009;41:280-282.
4. Coronary Artery Disease (C4D) Genetics Consortium. A genome-wide association study in Europeans and South Asians identifies five new loci for coronary artery disease. *Nat Genet.* 2011;43:339-344.
